# Supplementary material
Source: publisher figshare collection journal article supplement (https://gsapubs.figshare.com/ndownloader/files/23313893)

**GSA Data Repository Item 2018421** accompanies Kirby, M.E., Patterson, W.P., Ivanovici, L., Sandquist, D., and Glover, K.C., 2018, Evidence for a large middle Holocene flood event in the Pacific southwestern United States (Lake Elsinore, California), *in* Starratt, S.W., and Rosen, M.R., eds., From Saline to Freshwater: The Diversity of Western Lakes in Space and Time: Geological Society of America Special Paper 536, [https://doi.org/10.1130/2018.2536\(09\)](https://doi.org/10.1130/2018.2536(09)).

### **Caption**

Figure S1. Topographic map for Elsinore and immediate surroundings. Map data © 2019

Google.



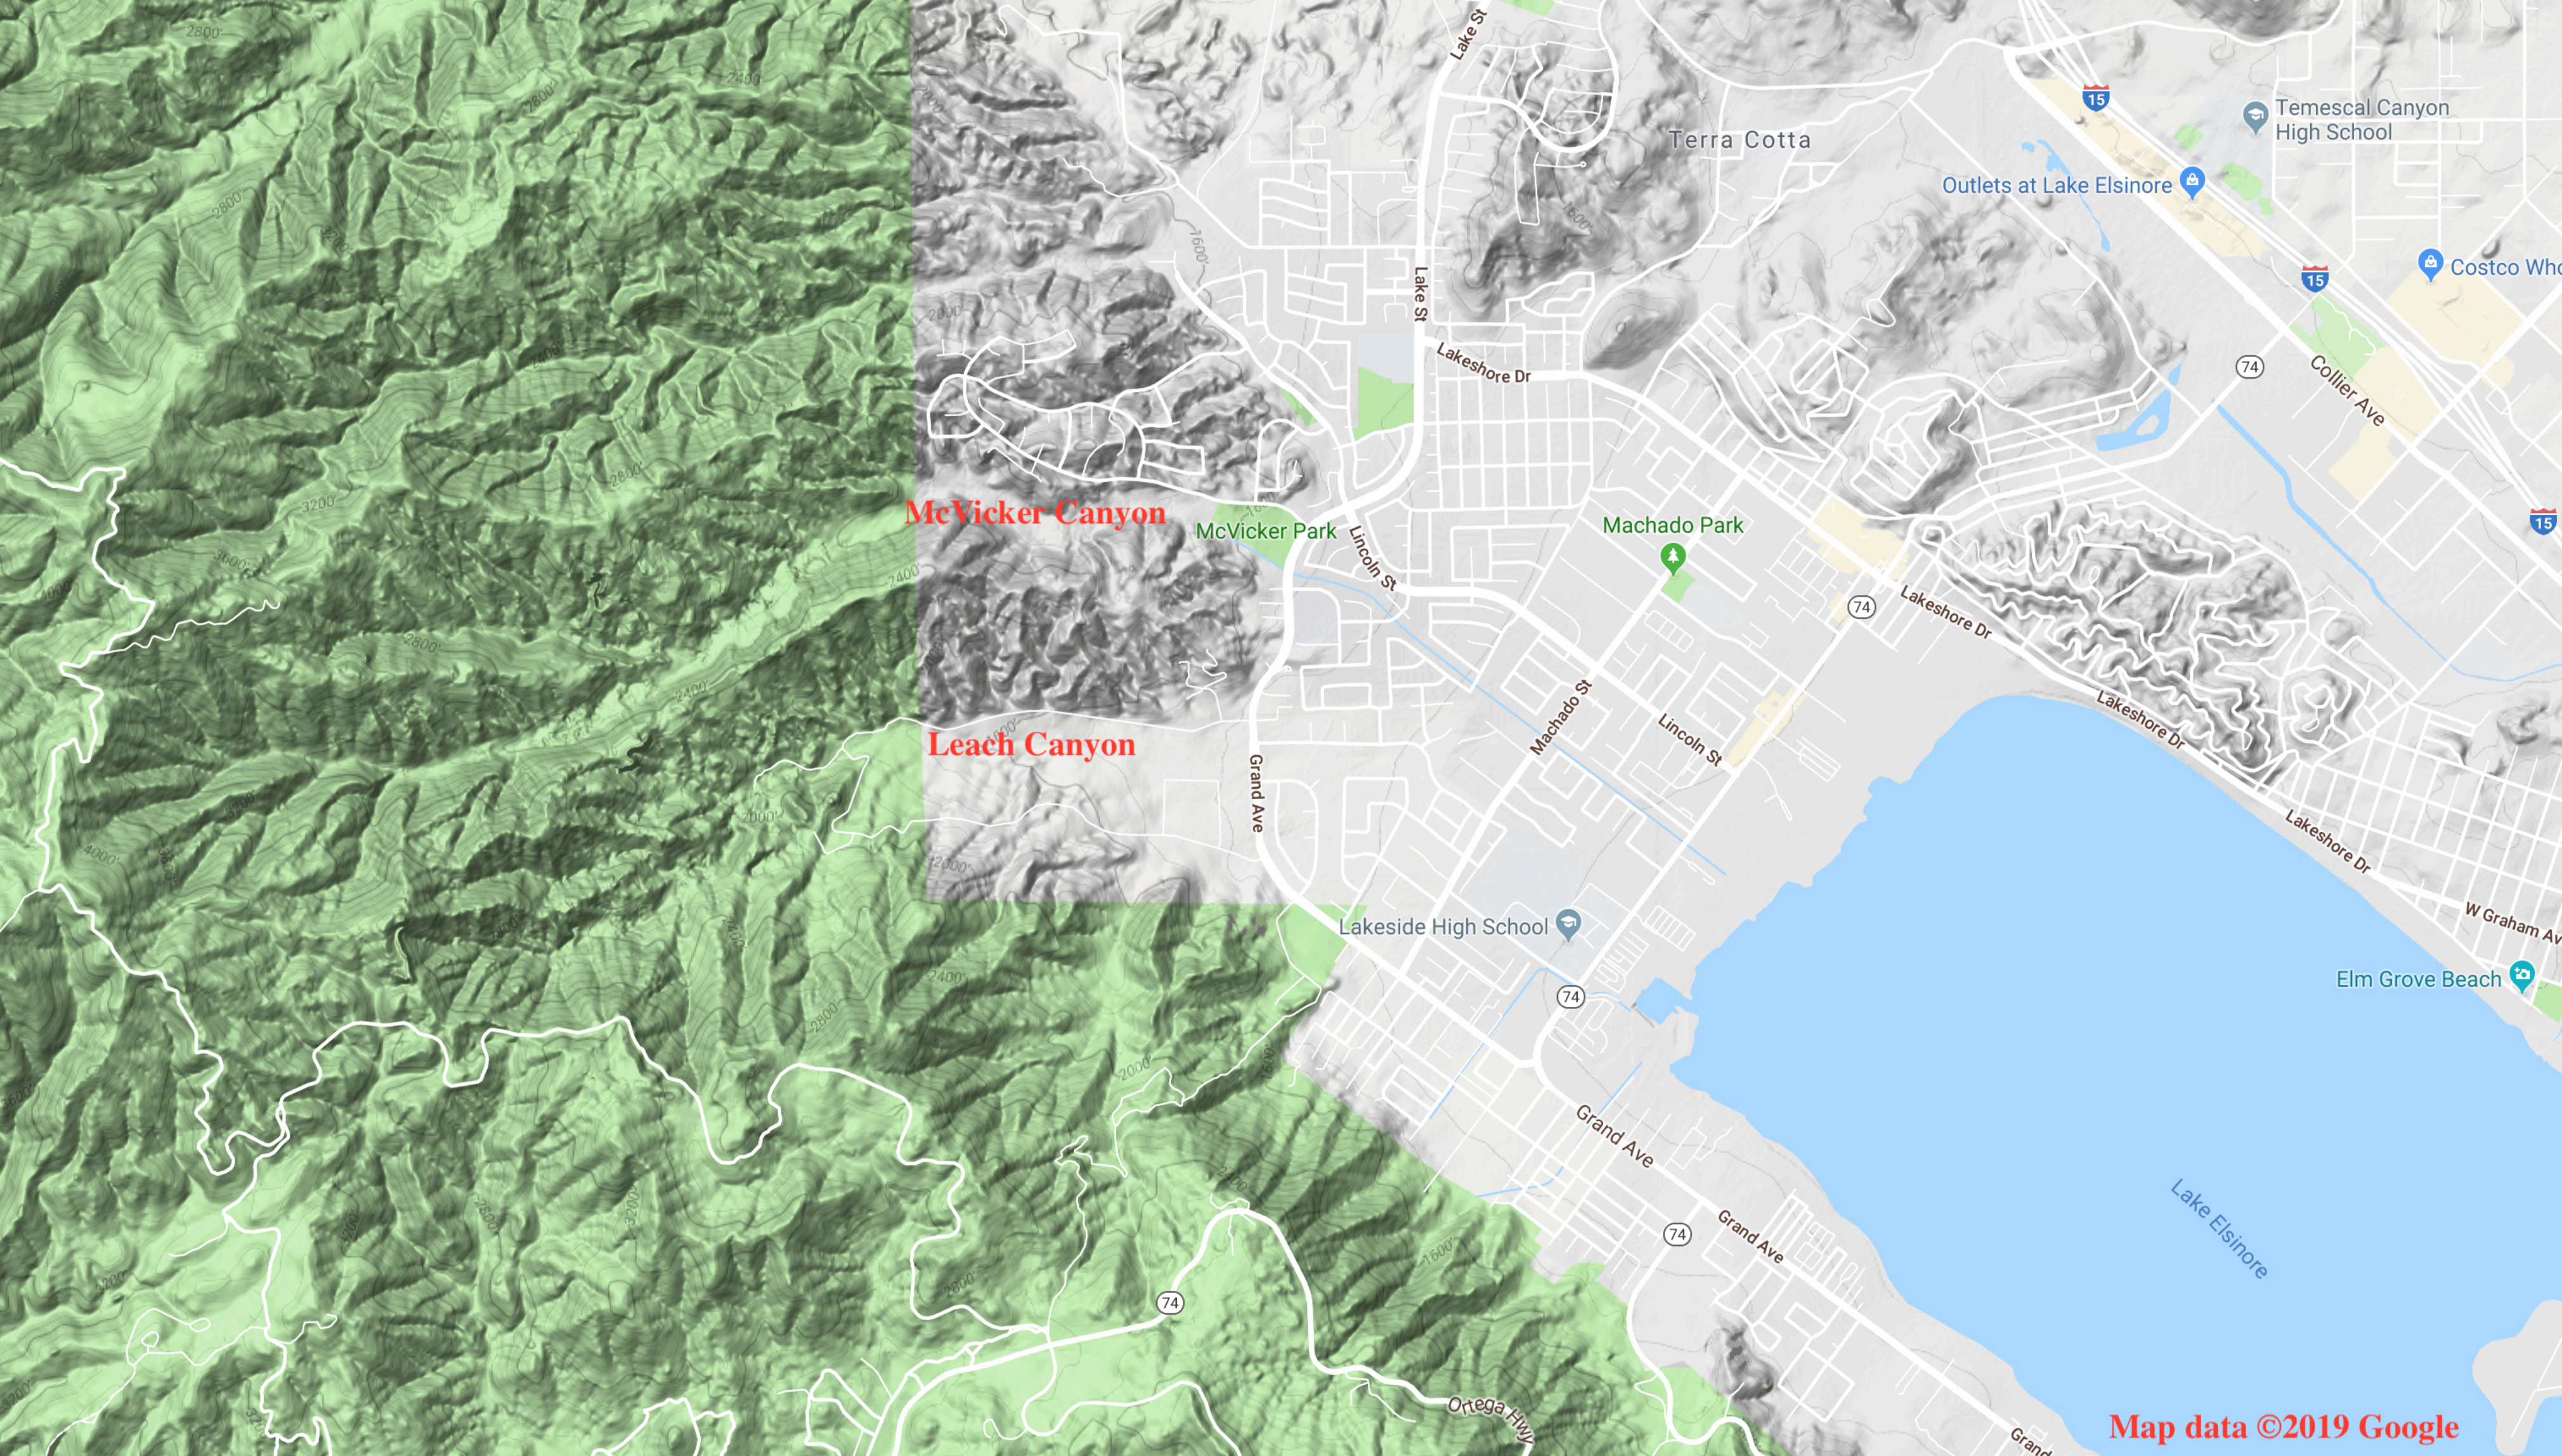

Supplement: Supplementary file 1 [file 23313893]
